# Supplementary material
Source: MDPI journal article supplement (https://www.mdpi.com/1424-8247/16/11/1604)
Supplement: s1 [file s1]

## Supplementary materials

Table S 1. MALDI-TOF MS identification of isolated bacteria.

| Isolate code number/MALDI TOF identification |                           |                             |
|----------------------------------------------|---------------------------|-----------------------------|
| Chronic rhinosinusitis                       | Chronic otitis media      | Chronic adenoiditis         |
| 1. <i>S. aureus</i>                          | 49. <i>H. influenzae</i>  | 84. <i>H. influenzae</i>    |
| 2. <i>S. aureus</i>                          | 50. <i>H. influenzae</i>  | 85. <i>H. influenzae</i>    |
| 3. <i>S. aureus</i>                          | 51. <i>H. influenzae</i>  | 86. <i>M. catarrhalis</i>   |
| 4. <i>S. aureus</i>                          | 52. <i>H. influenzae</i>  | 87. <i>M. catarrhalis</i>   |
| 5. <i>S. aureus</i>                          | 53. <i>M. catarrhalis</i> | 88. <i>M. catarrhalis</i>   |
| 6. <i>S. aureus</i>                          | 54. <i>M. catarrhalis</i> | 89. <i>M. catarrhalis</i>   |
| 7. <i>S. aureus</i>                          | 55. <i>M. catarrhalis</i> | 90. <i>M. catarrhalis</i>   |
| 8. <i>S. aureus</i>                          | 56. <i>M. catarrhalis</i> | 91. <i>M. catarrhalis</i>   |
| 9. <i>S. aureus</i>                          | 57. <i>M. catarrhalis</i> | 92. <i>M. catarrhalis</i>   |
| 10. <i>S. aureus</i>                         | 58. <i>P. aeruginosa</i>  | 93. <i>P. aeruginosa</i>    |
| 11. <i>S. aureus</i>                         | 59. <i>P. aeruginosa</i>  | 94. <i>P. aeruginosa</i>    |
| 12. <i>S. aureus</i>                         | 60. <i>P. aeruginosa</i>  | 95. <i>S. aureus</i>        |
| 13. <i>S. aureus</i>                         | 61. <i>P. aeruginosa</i>  | 96. <i>S. aureus</i>        |
| 14. <i>S. epidermidis</i>                    | 62. <i>P. aeruginosa</i>  | 97. <i>S. aureus</i>        |
| 15. <i>S. epidermidis</i>                    | 63. <i>P. aeruginosa</i>  | 98. <i>S. aureus</i>        |
| 16. <i>S. epidermidis</i>                    | 64. <i>P. aeruginosa</i>  | 99. <i>S. aureus</i>        |
| 17. <i>S. epidermidis</i>                    | 65. <i>S. aureus</i>      | 100. <i>S. aureus</i>       |
| 18. <i>S. epidermidis</i>                    | 66. <i>S. aureus</i>      | 101. <i>S. aureus</i>       |
| 19. <i>S. epidermidis</i>                    | 67. <i>S. aureus</i>      | 102. <i>S. aureus</i>       |
| 20. <i>S. epidermidis</i>                    | 68. <i>S. aureus</i>      | 103. <i>S. aureus</i>       |
| 21. <i>S. epidermidis</i>                    | 69. <i>S. aureus</i>      | 104. <i>S. epidermidis</i>  |
| 22. <i>S. epidermidis</i>                    | 70. <i>S. aureus</i>      | 105. <i>S. epidermidis</i>  |
| 23. <i>S. epidermidis</i>                    | 71. <i>S. aureus</i>      | 106. <i>S. epidermidis</i>  |
| 24. <i>S. epidermidis</i>                    | 72. <i>S. aureus</i>      | 107. <i>S. epidermidis</i>  |
| 25. <i>S. epidermidis</i>                    | 73. <i>S. epidermidis</i> | 108. <i>S. epidermidis</i>  |
| 26. <i>S. epidermidis</i>                    | 74. <i>S. epidermidis</i> | 109. <i>S. haemolyticus</i> |
| 27. <i>S. epidermidis</i>                    | 75. <i>S. epidermidis</i> | 110. <i>S. haemolyticus</i> |
| 28. <i>S. epidermidis</i>                    | 76. <i>S. epidermidis</i> | 111. <i>S. pneumoniae</i>   |
| 29. <i>S. epidermidis</i>                    | 77. <i>S. epidermidis</i> | 112. <i>S. pneumoniae</i>   |
| 30. <i>S. haemolyticus</i>                   | 78. <i>S. pneumoniae</i>  | 113. <i>S. pneumoniae</i>   |
| 31. <i>S. haemolyticus</i>                   | 79. <i>S. pneumoniae</i>  | 114. <i>S. pneumoniae</i>   |
| 32. <i>S. haemolyticus</i>                   | 80. <i>S. pneumoniae</i>  | 115. <i>S. pneumoniae</i>   |
| 33. <i>S. haemolyticus</i>                   | 81. <i>S. pneumoniae</i>  | 116. <i>S. pneumoniae</i>   |
| 34. <i>S. haemolyticus</i>                   | 82. <i>S. pneumoniae</i>  |                             |
| 35. <i>S. haemolyticus</i>                   | 83. <i>S. pneumoniae</i>  |                             |
| 36. <i>S. lugdunensis</i>                    |                           |                             |
| 37. <i>S. warneri</i>                        |                           |                             |
| 38. <i>S. warneri</i>                        |                           |                             |
| 39. <i>Str. pneumoniae</i>                   |                           |                             |
| 40. <i>Str. pneumoniae</i>                   |                           |                             |
| 41. <i>Str. pneumoniae</i>                   |                           |                             |
| 42. <i>P. aeruginosa</i>                     |                           |                             |
| 43. <i>P. aeruginosa</i>                     |                           |                             |
| 44. <i>P. aeruginosa</i>                     |                           |                             |

|                           |  |  |
|---------------------------|--|--|
| 45. <i>P. aeruginosa</i>  |  |  |
| 46. <i>M. catarrhalis</i> |  |  |
| 47. <i>M. catarrhalis</i> |  |  |
| 48. <i>M. catarrhalis</i> |  |  |
